# Supplementary material for: Possible climatic implications of high-altitude black carbon emissions
Source: Copernicus journal article supplement (doi:10.5194/acp-17-9623-2017), 2017-08-10
Supplement: Supplementary file [file acp-17-9623-2017-supplement-title-page.pdf › acp-17-9623-2017-supplement-title-page.pdf]

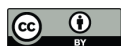

## *Supplement of*

# **Possible climatic implications of high-altitude black carbon emissions**

**Gaurav Govardhan et al.**

*Correspondence to:* Gaurav Govardhan (govardhan.gaurav@gmail.com)

- acp-17-9623-2017-supplement-title-page.pdf
- Mov1
  - Mov1.gif

The copyright of individual parts of the supplement might differ from the CC BY 3.0 License.
